# Supplementary material for: Protective Mechanism of the Antioxidant Baicalein toward Hydroxyl Radical-Treated Bone Marrow-Derived Mesenchymal Stem Cells
Source: MDPI journal article supplement (doi:10.3390/molecules23010223), 2018-01-20
Supplement: s1 [file s1]

产品分析证书  
Certificate of Analysis

中文名称: 黄芩素

English Name: Baicalein

别名 (Alias): 5,6,7-Trihydroxyflavone; Noroxylin

产品编码 (Cat. No.): BP0232

CAS Number: 491-67-8

分子式 (M. F.): C<sub>15</sub>H<sub>10</sub>O<sub>5</sub>

分子量 (M. W.): 270.24

批号 (Batch No.): PRF8020642

报告日期 (Report date): 2017年2月6日

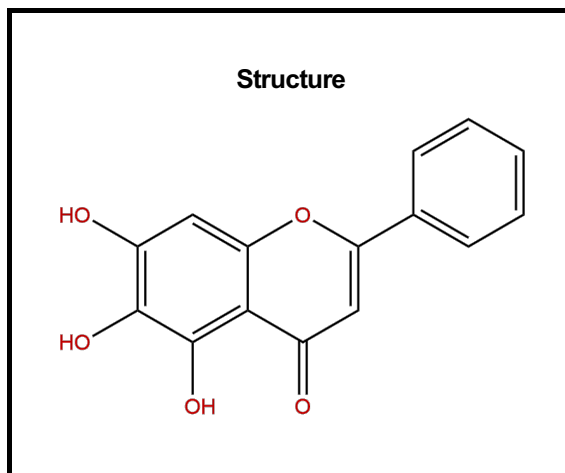

检验结果 (Analytical result):

| 检验项目 (Test Item)             | 检验指标 (Specifications)     | 检验结果 (Results) |
|------------------------------|---------------------------|----------------|
| 外观 Appearance                | Yellow powder             | Yellow powder  |
| 纯度 Purity (HPLC-DAD, 275nm)* | ≥98.0%                    | 99.30%         |
| 质谱 Mass                      | 270.2±1                   | Conforms       |
| 核磁 NMR                       | Comply with the structure | Conforms       |
| 水分 Water Content             | <3.0%                     | 0.9%           |

\* 色谱图见附件 (Please find HPLC chromatography attached.)

贮存条件 (Storage): 2~8℃, protected from light, keep package airproofed when not in use.

复测期 (Retest date): two years (2019-02-05) under conditions list above.

QC: Zhang Ling

Date: 2017年2月6日

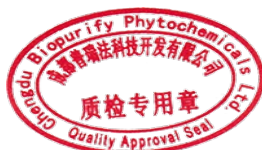

QA: Wu Qi

Date: 2017年2月6日

备注 (Remarks): The sample solutions should be prepared and used on the same day, it is the best preparing the solutions immediately before use. If the solutions have to be made up in advance, it should be made as aliquots in tightly sealed vials at less than -20℃. Generally, these might be useable for up to two weeks.

In case of quality issue, please contact us within 15 days after receipt of the product.

Tel: +86-28-82633397 Fax: +86-28-82633165

http://www.phytopurify.com Email: sales@biopurify.com biopurify@gmail.com

Add: No.11 Building, No. 388 Rongtaidadao CNSTP  
Wenjiang Zone, Chengdu, Sichuan, 611130 China  
TEL: 028-82633987 FAX: 028-82633165  
E-mail: biopurify@gmail.com sales@biopurify.com  
Web: www.biopurify.com

## Certificate of Analysis

**Product Name:** Chrysin

**Other Name:** Chrysinic acid

**Catalogue No.:** BP0346

**Batch No.:** PRF7080712

**Report date:** 2016-08-07

**CAS Number:** 480-40-0

**Mol. Formula:** C<sub>15</sub>H<sub>10</sub>O<sub>4</sub>

**Mol. Weight:** 254.24

**Botanical Source:** Ulmus sieboldiana

**Type of compound:**

**Identification Method:** Mass, NMR

**Analysis Method of Purity:** HPLC-DAD

**Structure:**

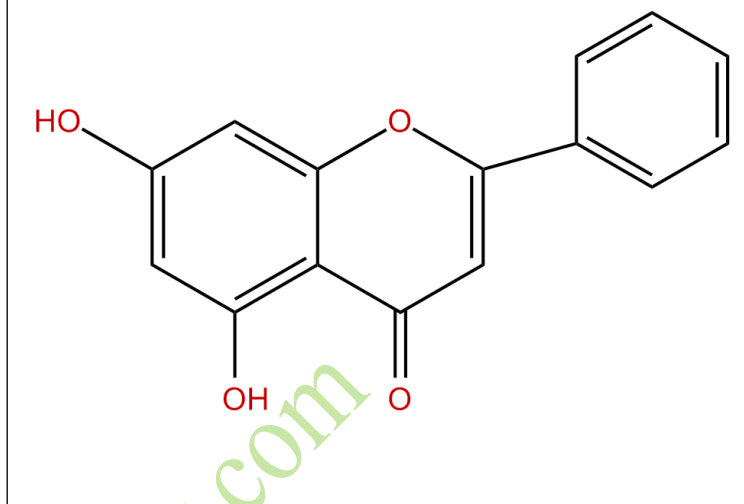

### Analytical result:

| Test                  | Specification | Results       |
|-----------------------|---------------|---------------|
| Appearance            | Yellow Powder | Yellow Powder |
| Loss on drying        | <3.0%         | 1.9%          |
| Purity (HPLC,268 nm)* | ≥98.0%        | 99.77%        |

\* Please find HPLC chromatography attached.

**Package:** Brown vial or HDPE Plastic Bottle

**Storage:** Cool and Dry place, protected from light, keep package airproofed when not in use.

**Expiration:** two years (2018-08-07) under conditions list above.

QC: *Meng Pan*

Date: 2016-08-07

QA: *Lianglei Zhang*

Date: 2016-08-07

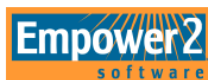

Chengdu Biopurify Phytochemicals Ltd

## SAMPLE INFORMATION

|                   |                       |                     |              |
|-------------------|-----------------------|---------------------|--------------|
| Sample Name:      | Chrysin PRF7080712    | Acquired By:        | panmeng      |
| Sample Type:      | Unknown               | Sample Set Name:    |              |
| Vial:             | 1:E,7                 | Acq. Method Set:    | Chrysin      |
| Injection #:      | 1                     | Processing Method:  | Samples      |
| Injection Volume: | 10.00 ul              | Channel Name:       | 268.0nm      |
| Run Time:         | 20.0 Minutes          | Proc. Chnl. Descr.: | PDA 268.0 nm |
| Date Acquired:    | 2016-8-7 16:43:53 CST |                     |              |
| Date Processed:   | 2016-8-7 17:06:13 CST |                     |              |

Auto-Scaled Chromatogram

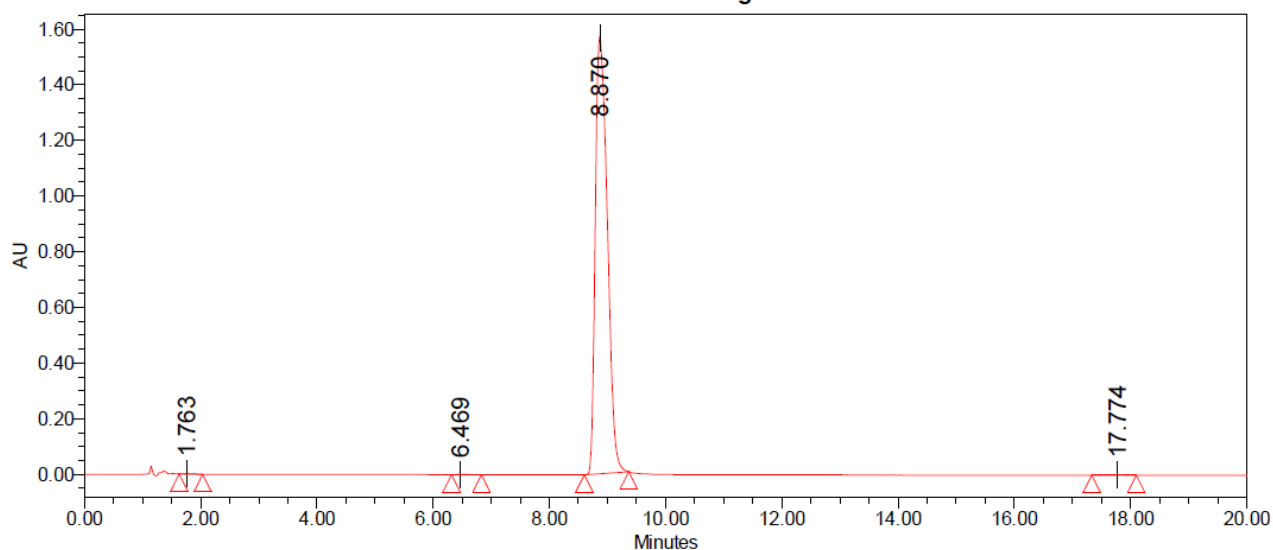

## Peak Results

|   | Name | RT     | Area     | % Area | USP Plate Count | USP Resolution |
|---|------|--------|----------|--------|-----------------|----------------|
| 1 |      | 1.763  | 20040    | 0.09   | 2371.72         |                |
| 2 |      | 6.469  | 15698    | 0.07   | 4882.74         | 6.31           |
| 3 |      | 8.870  | 22526451 | 99.77  | 8681.83         | 7.16           |
| 4 |      | 17.774 | 15678    | 0.07   | 30397.12        | 9.46           |

EM=270

8020642-LCMS Scan ESI+

Ret. Time: 3.80

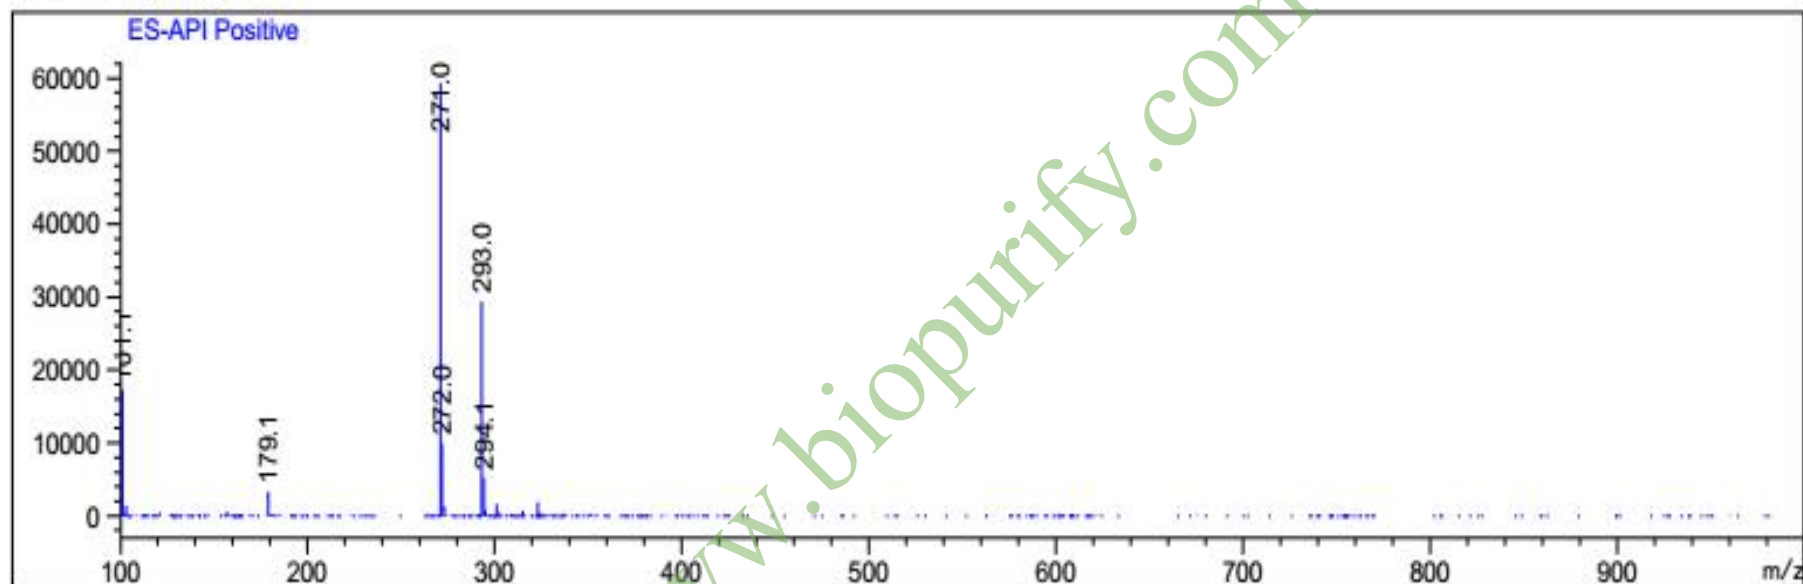

EM=270

8020642-LCMS Scan ESI-

Ret. Time: 3.81

<<<< NEGATIVE SPECTRA >>>>

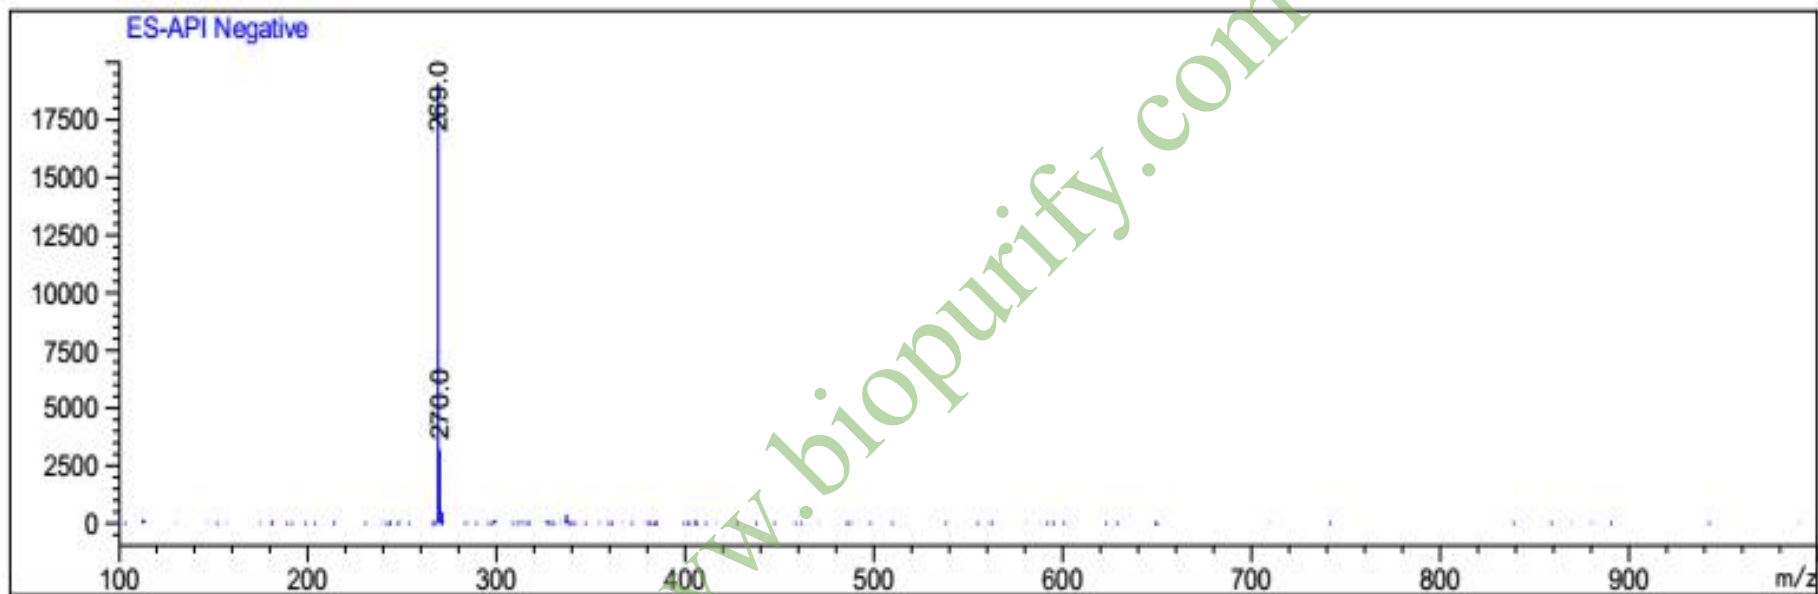

Thermo Fisher Nicolet 6700

溴化钾压片

Baicalein 8020642

测试人: L

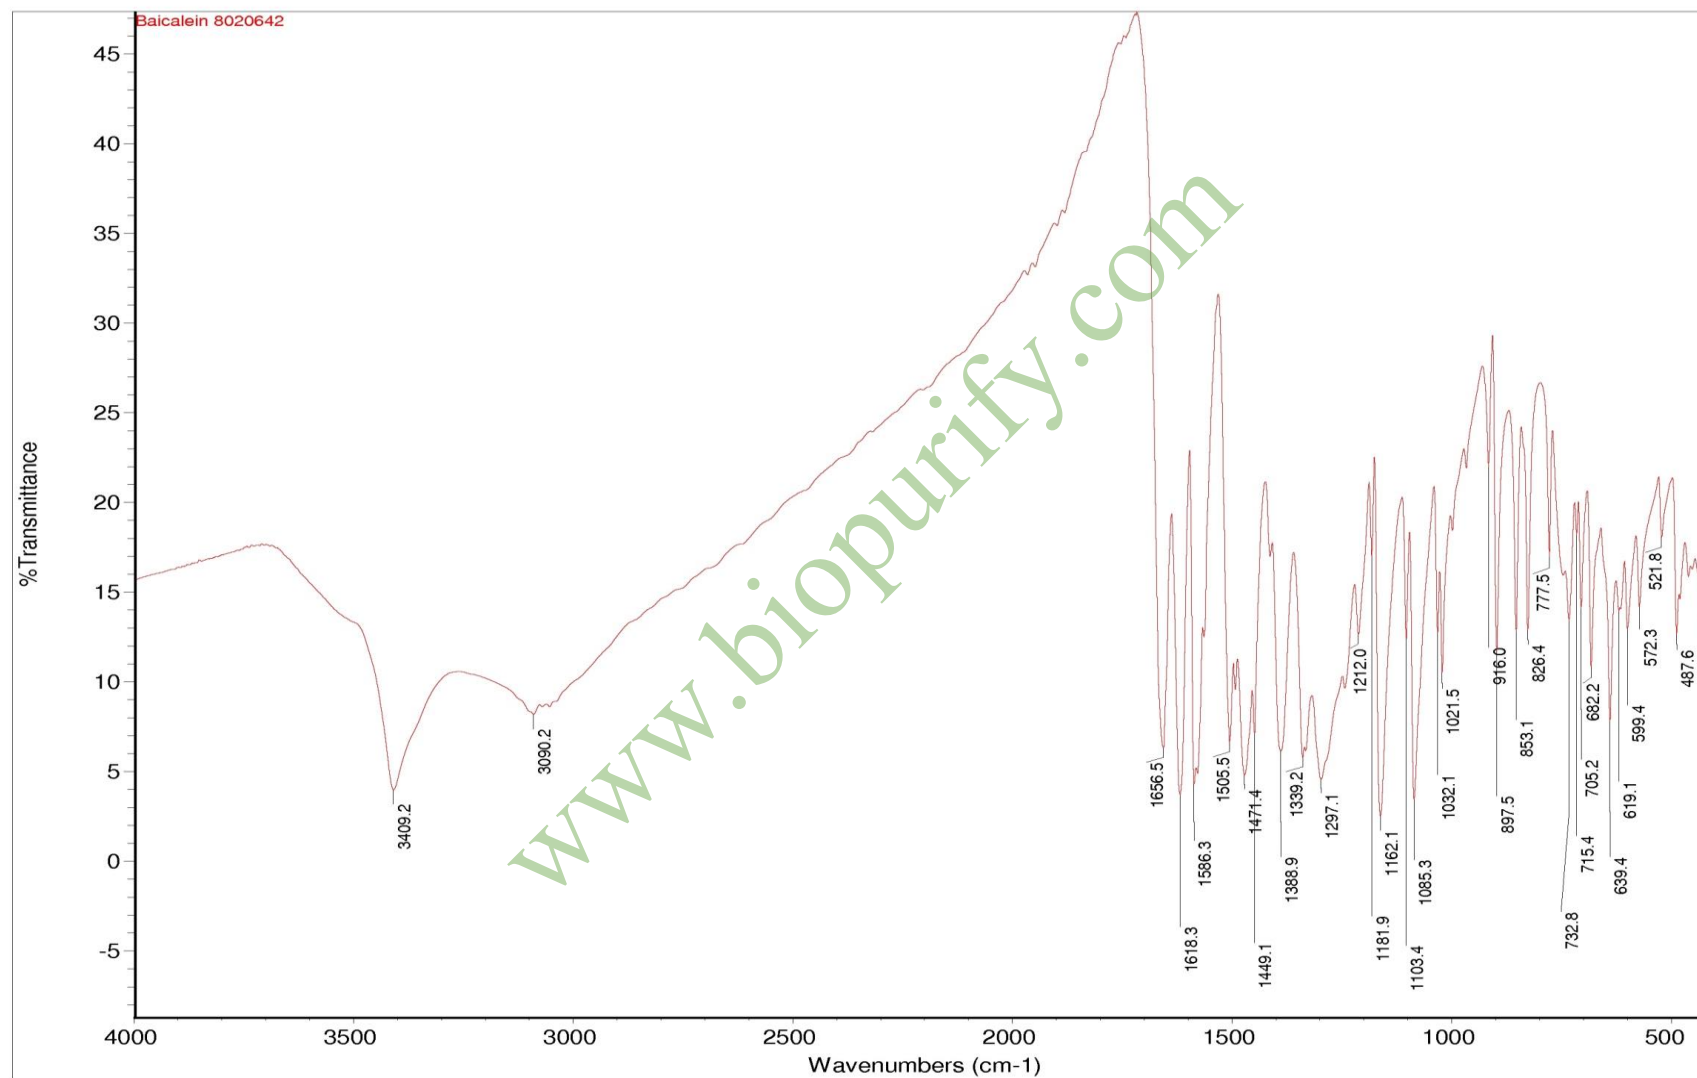

— 12.581

8.663  
8.088  
8.085  
8.069  
8.064  
7.648  
7.643  
7.630  
7.628  
7.618  
7.613  
7.609  
7.604  
7.594  
7.584  
7.580  
7.572  
7.046  
6.999  
5.462  
5.233  
5.215  
4.042  
4.018  
3.470  
3.452  
3.434  
3.430  
3.415  
3.406  
3.396  
3.376  
3.354  
3.332

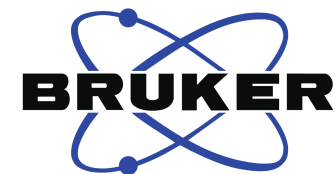

Current Data Parameters  
NAME Baicalin-1H NMR DMSO  
EXPNO 1  
PROCNO 1

F2 - Acquisition Parameters  
Date\_ 20170225  
Time 17.16  
INSTRUM spect  
PROBHD 5 mm PABBO BB/  
PULPROG zg30  
TD 65536  
SOLVENT DMSO  
NS 16  
DS 2  
SWH 8012.820 Hz  
FIDRES 0.122266 Hz  
AQ 4.0894465 sec  
RG 202.5  
DW 62.400 usec  
DE 6.50 usec  
TE 301.2 K  
D1 2.00000000 sec  
TD0 1

===== CHANNEL f1 =====  
SFO1 400.1324710 MHz  
NUC1 1H  
P1 14.79 usec  
PLW1 11.50800037 W

F2 - Processing parameters  
SI 65536  
SF 400.1300023 MHz  
WDW EM  
SSB 0  
LB 0.30 Hz  
GB 0  
PC 1.00  
SR 2.34 Hz

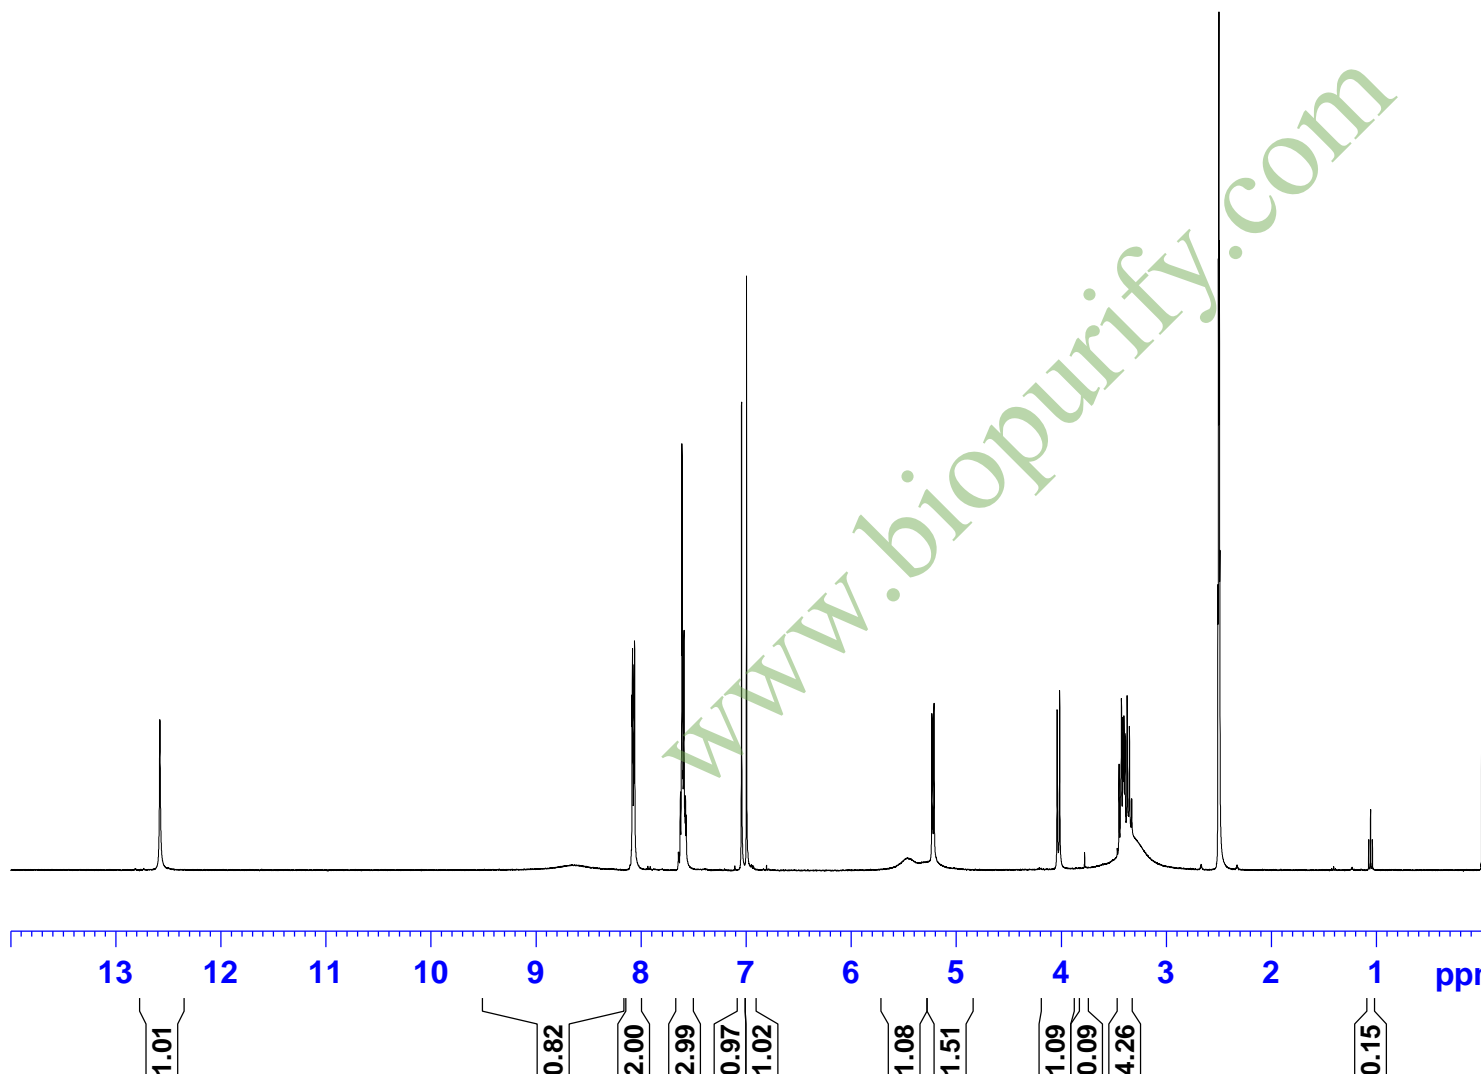



# Current Data Parameters

NAME Baicalin-1H NMR DMSO  
EXPNO 1  
PROCNO 1

## F2 - Acquisition Parameters

Date\_ 20170225  
Time 17.16  
INSTRUM spect  
PROBHD 5 mm PABBO BB/  
PULPROG zg30  
TD 65536  
SOLVENT DMSO  
NS 16  
DS 2  
SWH 8012.820 Hz  
FIDRES 0.122266 Hz  
AQ 4.0894465 sec  
RG 202.5  
DW 62.400 usec  
DE 6.50 usec  
TE 301.2 K  
D1 2.00000000 sec  
TD0 1

## ===== CHANNEL f1 =====

SFO1 400.1324710 MHz  
NUC1 1H  
P1 14.79 usec  
PLW1 11.50800037 W

## F2 - Processing parameters

SI 65536  
SF 400.1300023 MHz  
WDW EM  
SSB 0  
LB 0.30 Hz  
GB 0  
PC 1.00  
SR 2.34 Hz

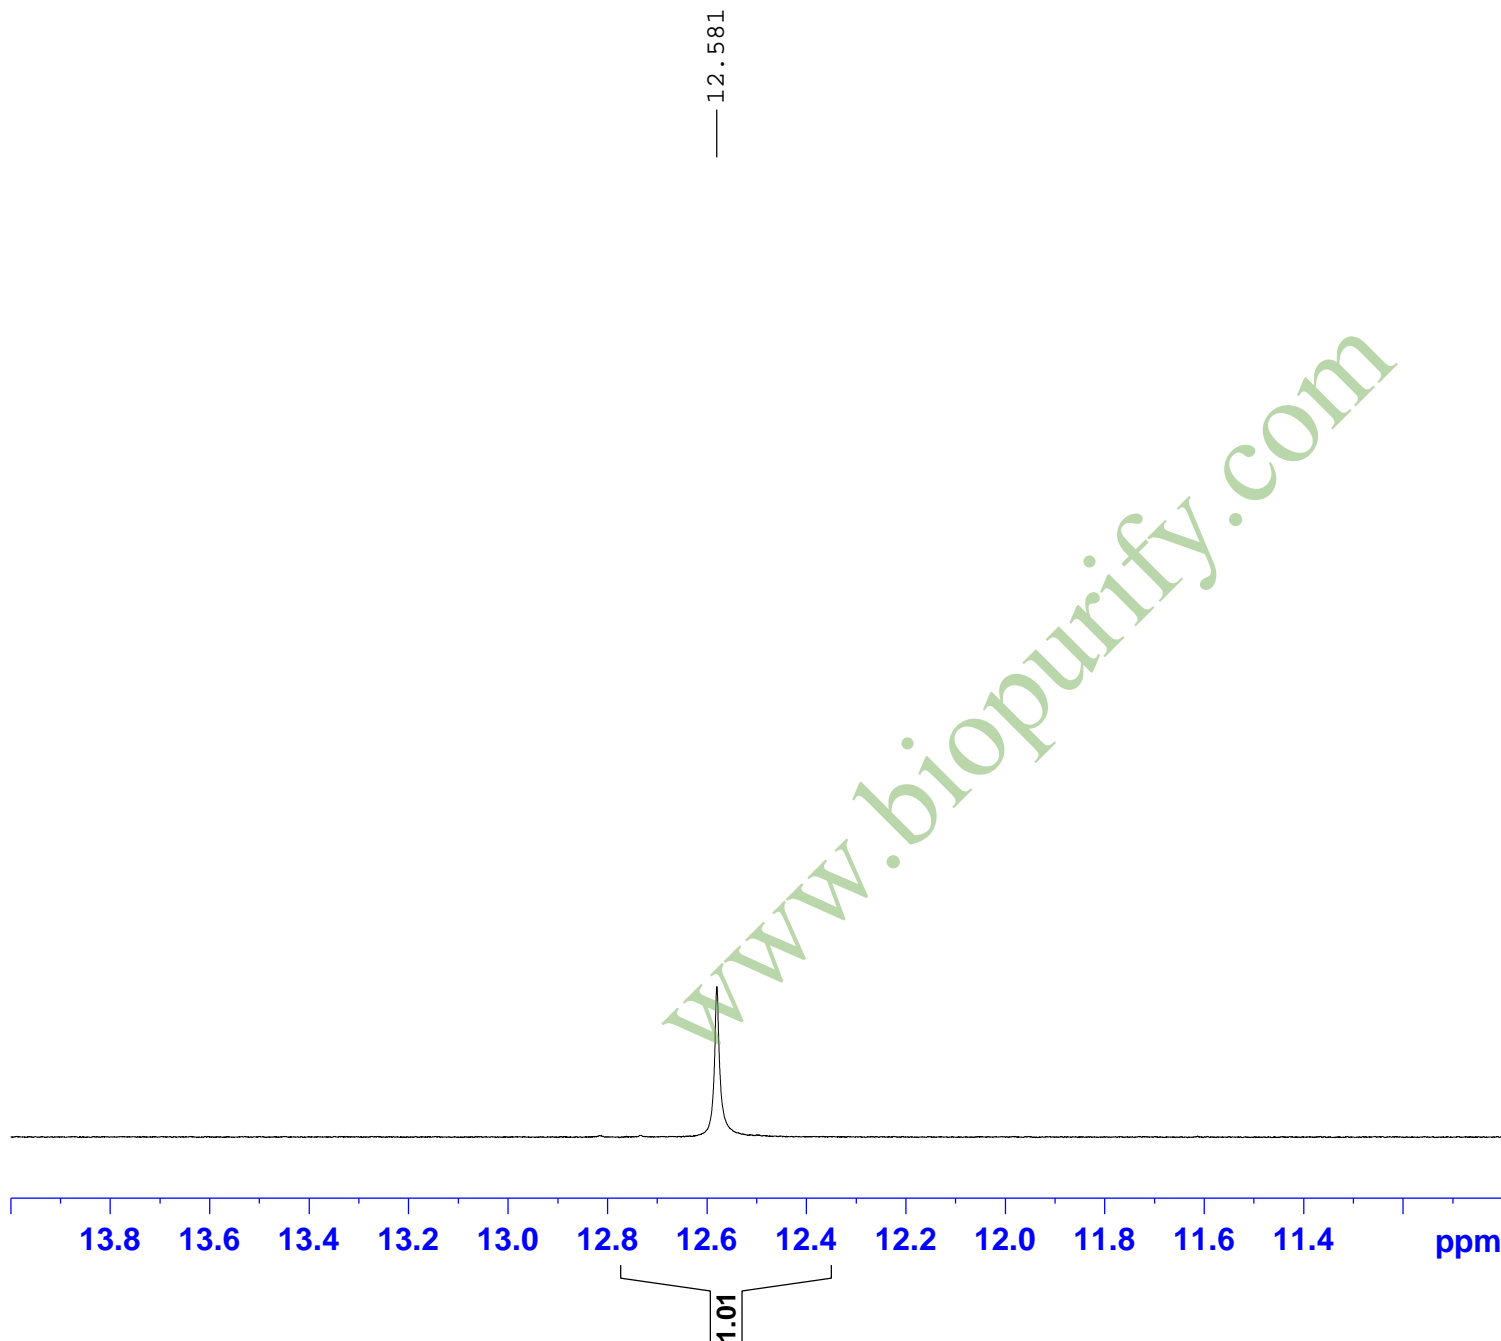





Current Data Parameters  
NAME Baicalin-1H NMR DMSO  
EXPNO 1  
PROCNO 1

F2 - Acquisition Parameters  
Date\_ 20170225  
Time 17.16  
INSTRUM spect  
PROBHD 5 mm PABBO BB/  
PULPROG zg30  
TD 65536  
SOLVENT DMSO  
NS 16  
DS 2  
SWH 8012.820 Hz  
FIDRES 0.122266 Hz  
AQ 4.0894465 sec  
RG 202.5  
DW 62.400 usec  
DE 6.50 usec  
TE 301.2 K  
D1 2.00000000 sec  
TD0 1

===== CHANNEL f1 =====  
SFO1 400.1324710 MHz  
NUC1 1H  
P1 14.79 usec  
PLW1 11.50800037 W

F2 - Processing parameters  
SI 65536  
SF 400.1300023 MHz  
WDW EM  
SSB 0  
LB 0.30 Hz  
GB 0  
PC 1.00  
SR 2.34 Hz

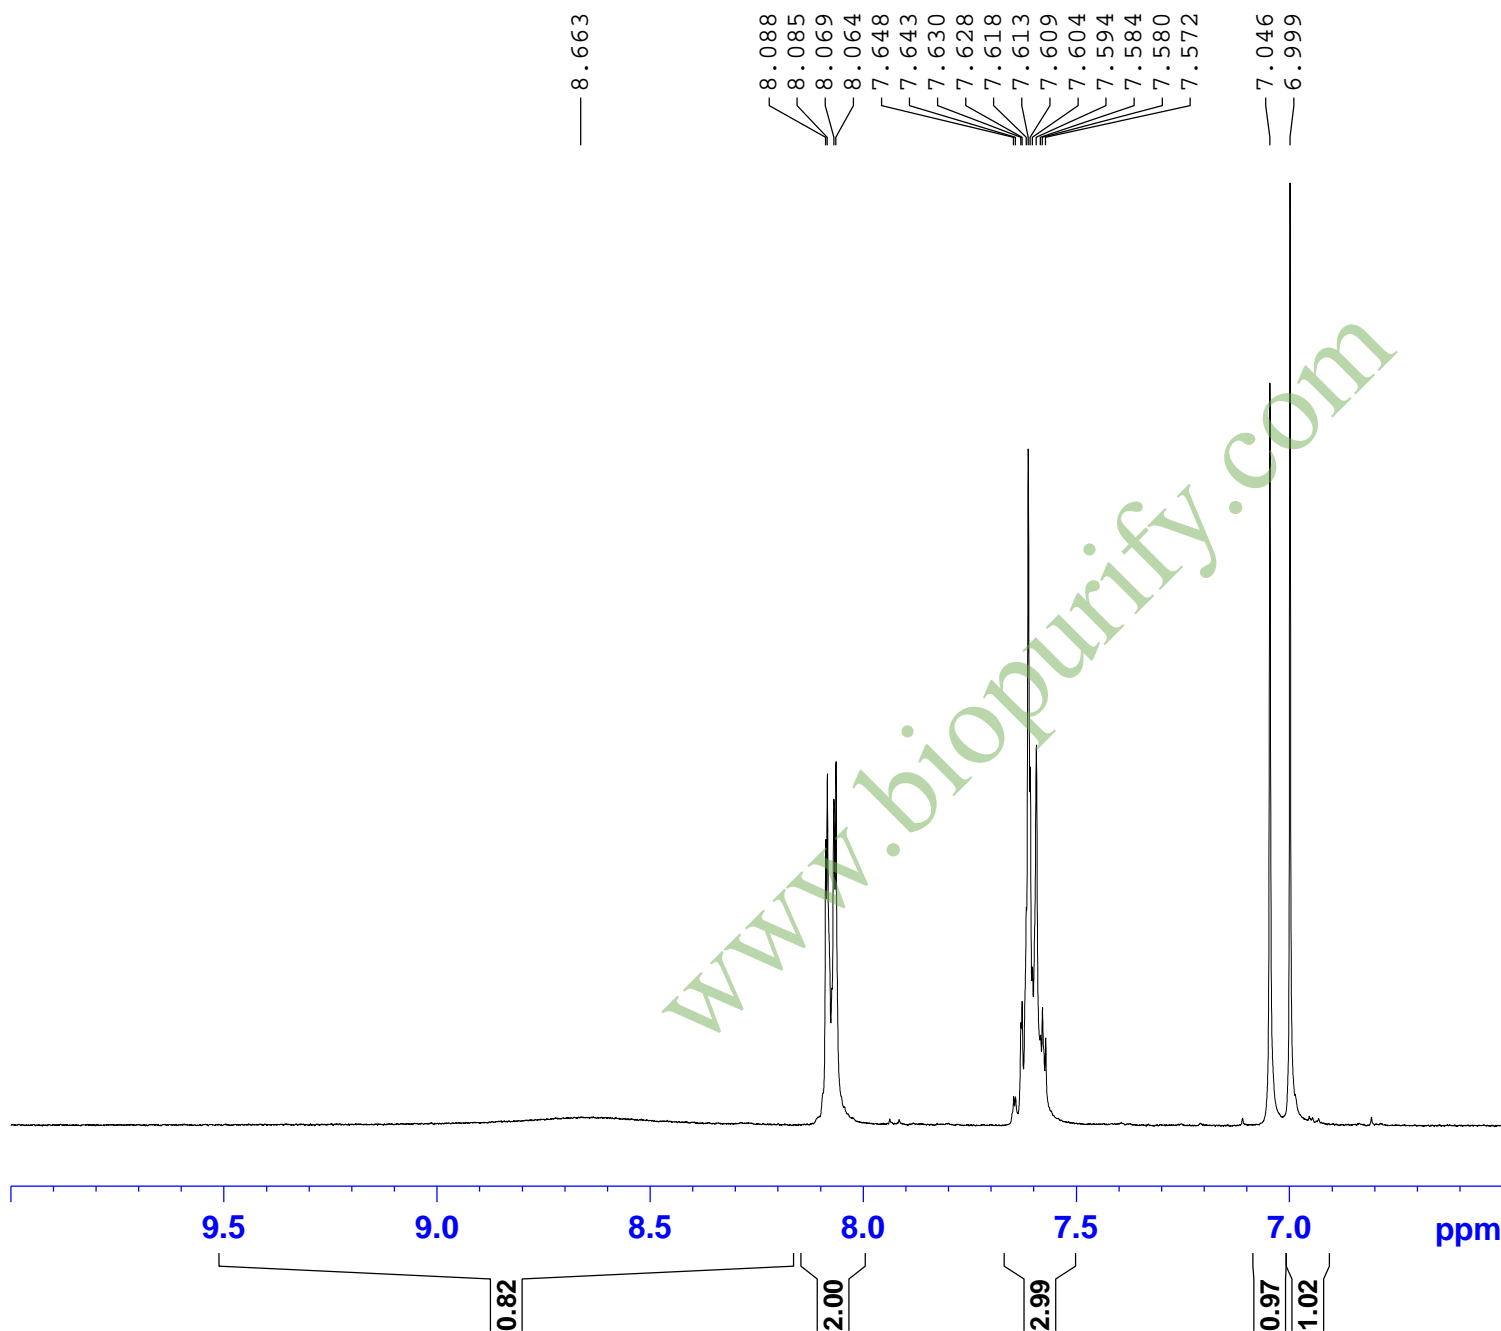

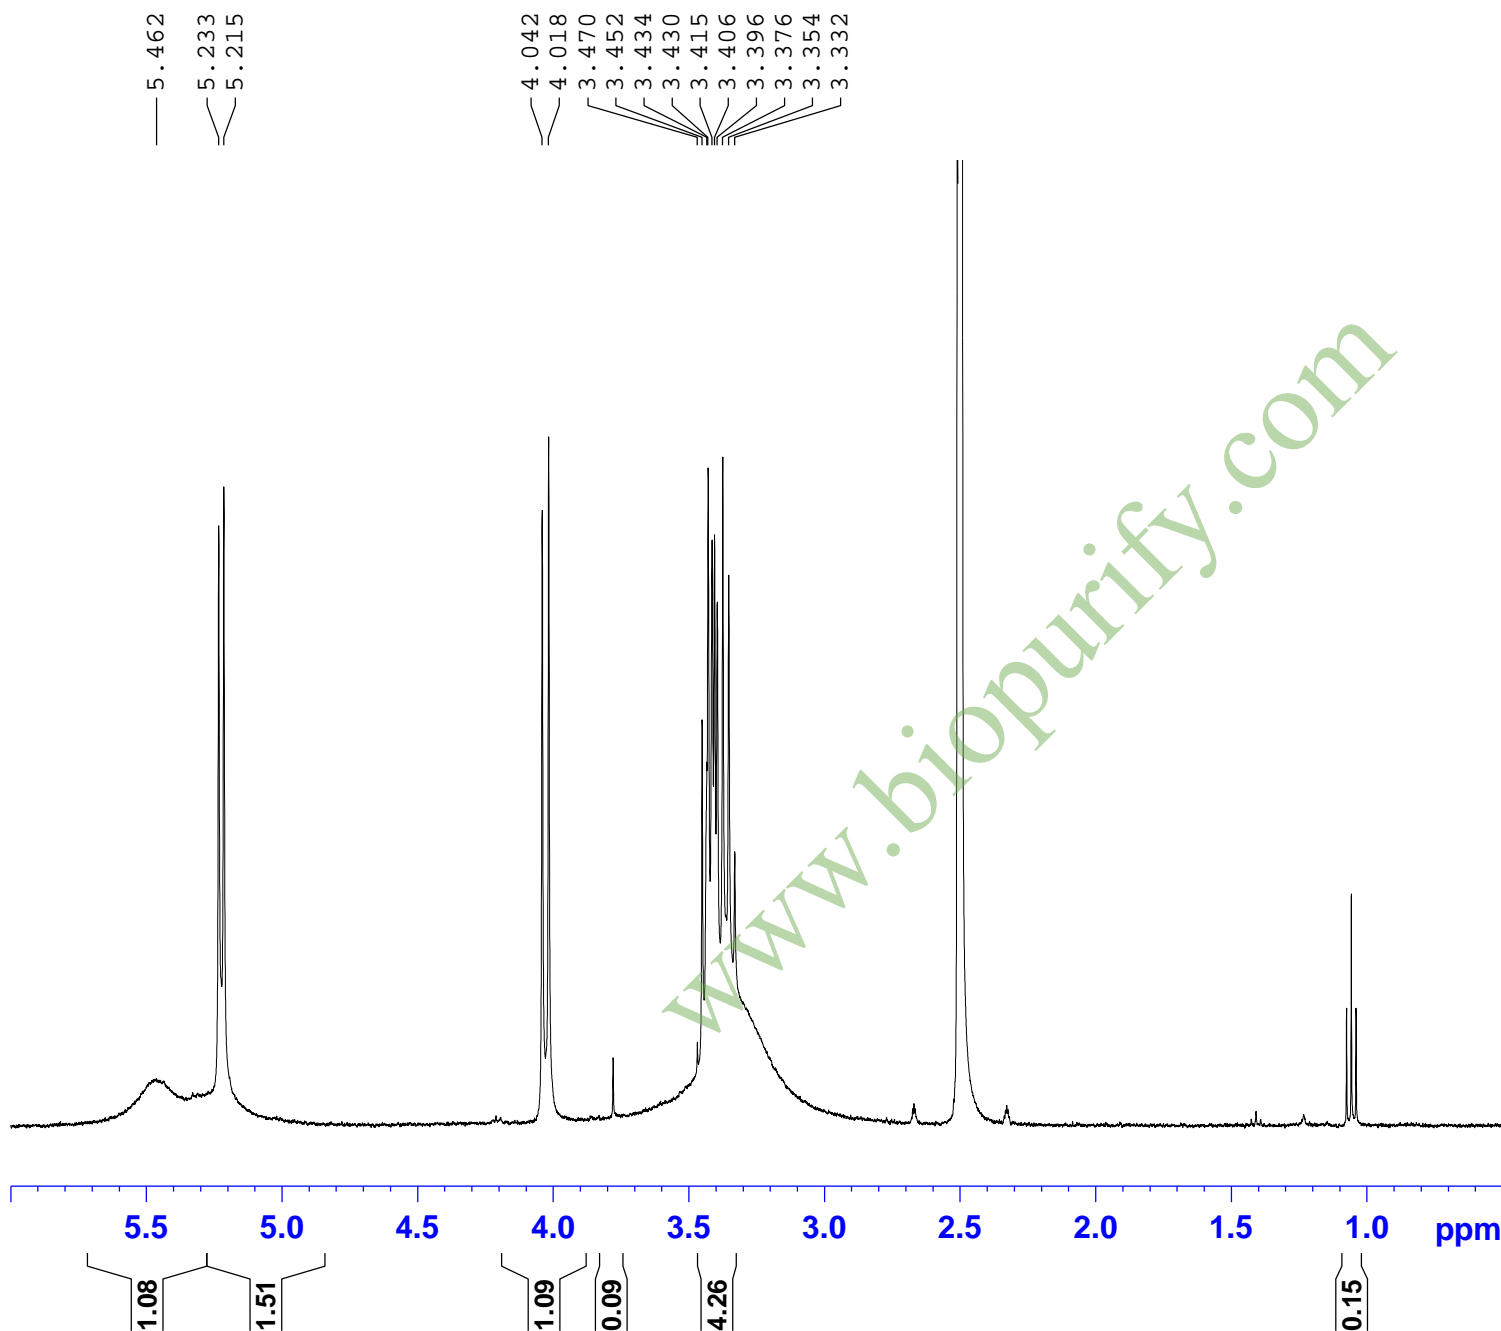

Current Data Parameters  
NAME Baicalin-1H NMR DMSO  
EXPNO 1  
PROCNO 1

F2 - Acquisition Parameters  
Date\_ 20170225  
Time 17.16  
INSTRUM spect  
PROBHD 5 mm PABBO BB/  
PULPROG zg30  
TD 65536  
SOLVENT DMSO  
NS 16  
DS 2  
SWH 8012.820 Hz  
FIDRES 0.122266 Hz  
AQ 4.0894465 sec  
RG 202.5  
DW 62.400 usec  
DE 6.50 usec  
TE 301.2 K  
D1 2.00000000 sec  
TD0 1

===== CHANNEL f1 =====  
SF01 400.1324710 MHz  
NUC1 1H  
P1 14.79 usec  
PLW1 11.50800037 W

F2 - Processing parameters  
SI 65536  
SF 400.1300023 MHz  
WDW EM  
SSB 0  
LB 0.30 Hz  
GB 0  
PC 1.00  
SR 2.34 Hz

# SAMPLE INFORMATION

|                   |                       |                     |              |
|-------------------|-----------------------|---------------------|--------------|
| Sample Name:      | Baicalein PRF8020642  | Acquired By:        | System       |
| Sample Type:      | Unknown               | Sample Set Name:    |              |
| Vial:             | 6                     | Acq. Method Set:    | Baicalein    |
| Injection #:      | 1                     | Processing Method:  | Samples      |
| Injection Volume: | 10.00 ul              | Channel Name:       | 275.0nm      |
| Run Time:         | 25.0 Minutes          | Proc. Chnl. Descr.: | PDA 275.0 nm |
| Date Acquired:    | 2017-2-6 11:26:21 CST |                     |              |
| Date Processed:   | 2017-2-6 12:48:09 CST |                     |              |

## Auto-Scaled Chromatogram

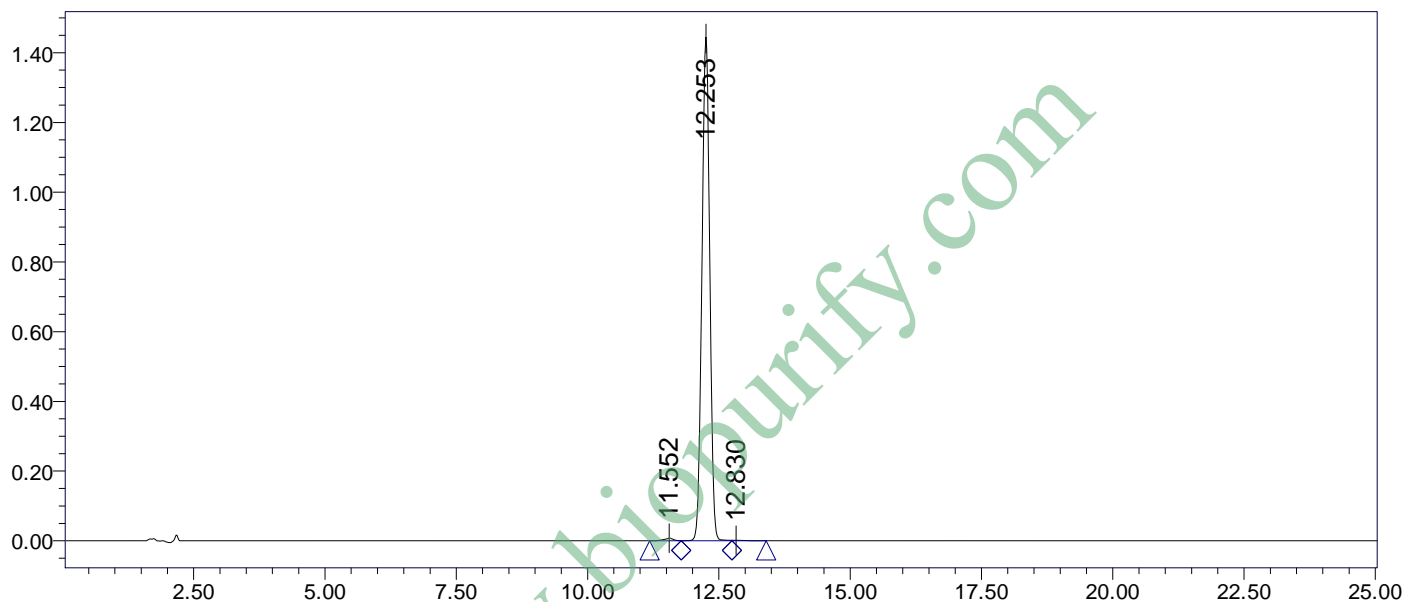

## Peak Results

|   | RT     | Area     | % Area | USP Plate Count | USP Resolution |
|---|--------|----------|--------|-----------------|----------------|
| 1 | 11.552 | 88943    | 0.59   | 20288.60        |                |
| 2 | 12.253 | 14956771 | 99.30  | 31433.73        | 2.25           |
| 3 | 12.830 | 15751    | 0.10   |                 |                |
